# Myocardial Effects of Halothane and Isoflurane in Senescent Rats

Sandrine Rozenberg, M.D.,\* Sophie Besse, Ph.D.,† Benoît Vivien, M.D.,‡ Pierre Coriat, M.D.,§ Bruno Riou, M.D., Ph.D.||

**Background:** Aging is associated with marked alterations in myocardial contraction and relaxation, whereas halogenated anesthetics depress myocardial contractility. However, their effects on aging myocardium are unknown.

**Methods:** Mechanical variables of left ventricular papillary muscles from adult and senescent rats (29°C; pH 7.40;  $\text{Ca}^{2+}$  1.0 or 0.5 mM; stimulation frequency, 12 pulses/min) were studied. The expression of genes coding for the  $\alpha$ - and  $\beta$ -myosin heavy chain (MHC) and  $\text{Ca}^{2+}$ -ATPase of the sarcoplasmic reticulum (SR) were studied. The effects of halothane and isoflurane were studied. The inotropic effects were compared under low and high loads, using the maximum unloaded shortening velocity ( $V_{\max}$ ) and maximum isometric active force (AF). The lusitropic effects were compared in isotonic and isometric conditions.

**Results:** Senescent rats had a decrease in contraction and relaxation velocities, associated with a reexpression of  $\beta$ -MHC mRNAs and a decrease in SR  $\text{Ca}^{2+}$ -ATPase mRNAs. Halothane induced a lower negative inotropic effect in senescent rats (1.5 vol%, AF:  $53 \pm 14\%$  vs.  $39 \pm 12\%$  of baseline values;  $P < 0.01$ ) whereas isoflurane induced a similar negative inotropic effect (1.5 vol%, AF:  $81 \pm 7\%$  vs.  $87 \pm 7\%$  of baseline values; NS). Halothane induced a negative lusitropic effect in isotonic conditions in adult, but not in senescent, rats.

**Conclusions:** The inotropic and lusitropic effects of halothane were less important in senescent than in adult rats, whereas the effects of isoflurane were similar. These differences are probably related to differences in SR function and in the effects of halogenated anesthetics on the SR.

HALOGENATED anesthetics induce negative inotropic effects on the myocardium that have been reported *in vivo* and *in vitro* in various animal species and humans.<sup>1-3</sup> The negative inotropic effects of halogenated anesthetics are more pronounced in several myocardial diseases such as ischemia,<sup>4</sup> and pacing-induced<sup>5</sup> and genetically-induced cardiomyopathies.<sup>6</sup> The effects of halogenated anesthetics on senescent myocardium remain unknown, whereas senescence *per se* can induce important myocardial changes, including: (1) a loss of

myocytes and fibrosis associated with myocyte hypertrophy, which is more significant in the left ventricle than in the right ventricle<sup>7</sup>; (2) abnormal accumulation of fibrillar collagen, both around the vessels and within the interstitium,<sup>7</sup> which is the major determinant of both the alteration in diastolic compliance and occurrence of arrhythmias; (3) prolongation of the myoplasmic calcium transient, without any modification of its amplitude<sup>8</sup>; (4) slowing of the contraction,<sup>8</sup> enabling the senescent muscle to maintain a normal active tension to the detriment of the velocity at which this tension is developed and related to reexpression of  $\beta$ -myosin heavy chain<sup>9</sup>; (5) impairment in relaxation,<sup>9</sup> related to a decreased activity of  $\text{Na}^+$ - $\text{Ca}^{2+}$  exchanger and sarcoplasmic reticulum (SR)  $\text{Ca}^{2+}$ -ATPase.<sup>10</sup>

The myocardial consequences of senescence during aging contrast with our poor understanding of the effects of halogenated anesthetics. Epidemiologic studies have recently emphasized the public health problems of the aged population, suggesting a growing use of anesthesia in elderly patients.<sup>11</sup> The need to develop our knowledge in geriatric anesthesia has also been recently pointed out.<sup>12</sup> Therefore, we conducted an *in vitro* study of the myocardial effects of halothane and isoflurane in adult and senescent rats. We hypothesized that the effects of halogenated anesthetics differ in senescent myocardium.

## Materials and Methods

Adult (3-month-old) and senescent (24-month-old) male Wistar rats from the same origin (Iffa Credo, Lyon, France) were studied. Care of the animals conformed to the recommendations of the Helsinki Declaration, and the study was performed in accordance with the regulations of the official edict of the French Ministry of Agriculture. Body weight was determined at the moment of killing; heart weight, and left ventricular weight were determined after. Heart weight to body weight and left ventricular weight to body weight ratios were calculated.

### Experimental Protocol

Left ventricular papillary muscles were studied in a Krebs-Henseleit bicarbonate buffer solution (118 mM NaCl, 4.7 mM KCl, 1.2 mM  $\text{MgSO}_4$ , 1.1 mM  $\text{KH}_2\text{PO}_4$ , 25 mM  $\text{NaHCO}_3$ , 2.5 mM  $\text{CaCl}_2$ , and 4.5 mM glucose) maintained at 29°C with a thermostatic water circulator. Muscles were field stimulated at 12 pulses/min with rectangular wave pulses lasting 5 ms just above threshold. The bathing solution was bubbled with 95% oxygen

\* Research Fellow, Laboratory of Anesthesiology, † Associate Professor, University René Descartes and Laboratory of Experimental Anesthesiology, ‡ Assistant Professor, Department of Anesthesiology, § Professor of Anesthesiology and Chairman, Department of Anesthesiology, || Director of the Laboratory of Experimental Anesthesiology, Professor of Anesthesiology and Chairman, Department of Emergency Medicine and Surgery, CHU Pitié-Salpêtrière.

From the Laboratoire d'Anesthésiologie, Département d'Anesthésie-Réanimation, and Service d'Accueil des Urgences, Centre Hospitalier Universitaire (CHU) Pitié-Salpêtrière, Assistance Publique-Hôpitaux de Paris (AP-HP), Université Pierre et Marie Curie, and UFR Sciences et Techniques des Activités Physiques et Sportives (STAPS), Université René Descartes, Paris, France. Submitted for publication January 22, 2002. Accepted for publication June 26, 2002. Dr. Rozenberg was the recipient of a fellowship grant from the Fondation pour la Recherche Médicale, Paris, France. This study was supported by a grant from Association Claude Bernard, Paris, France.

Address reprint requests to Dr. Riou: Département d'Anesthésie-Réanimation, CHU Pitié-Salpêtrière, 47 Boulevard de l'Hôpital, 75651 Paris Cedex 13, France. Address electronic mail to: bruno.riou@psl.ap-hop-paris.fr. Individual article reprints may be purchased through the Journal Web site, www.anesthesiology.org.

and 5% carbon dioxide, resulting in a pH of 7.40. After a 60 min stabilization period at the initial muscle length at the apex of the length-active isometric tension curve ( $L_{\max}$ ), papillary muscles recovered their optimal mechanical performance.<sup>2,6</sup> In a preliminary study, we verified that the stability of the preparation was obtained over 120 min in papillary muscles from adult ( $n = 7$ ) and senescent ( $n = 6$ ) rats (data not shown). The extracellular calcium concentration ( $[Ca^{2+}]_o$ ) was decreased from 2.5 to 1 mM because rat myocardial contractility is nearly maximum at 2.5 mM, and hence it is difficult to quantify inotropic changes without previously decreasing  $[Ca^{2+}]_o$ . We performed additional experiments at a  $[Ca^{2+}]_o$  of 0.5 mM, because the lusitropic effects of halothane are modulated by  $[Ca^{2+}]_o$ , and postrest potentiation is more sensitive at low  $[Ca^{2+}]_o$ .<sup>13</sup>

#### *Volatile Anesthetic Agent Administration*

Halothane (Fluotec 3; Cyprane Ltd, Keighley, UK) and isoflurane (Fortec 3, Cyprane Ltd) were added to the carbon dioxide-oxygen mixture with calibrated vaporizers.<sup>2,6</sup> Anesthetic concentrations in the gas phase were monitored continuously using an infrared analyzer (Artema MM 206SD; Taema, Antony, France). Halothane concentrations ranged from 0.3 to 1.5 vol%, and those of isoflurane from 0.4 to 2 vol%, equivalent to 0.5 to 2.5 minimum alveolar concentration (MAC), respectively.<sup>14</sup> Since MAC values of halogenated anesthetics are lower in senescent rats,<sup>15</sup> we also compared halogenated anesthetics at equipotent concentrations (expressed as MAC). A correction factor of -17% was applied to estimate real MAC values in senescent rats.<sup>15</sup> A 20-min equilibration period was allowed between each anesthetic concentration.

#### *Mechanical Parameters*

The electromagnetic lever system has been described previously.<sup>13</sup> All analyses were made from digital records of force and length obtained with a computer.<sup>13</sup> Conventional mechanical variables at  $L_{\max}$  were calculated from three twitches. The first twitch was isotonic and was loaded with the preload corresponding to  $L_{\max}$ . The second twitch was fully isometric at  $L_{\max}$ . The third twitch was abruptly clamped to zero-load just after the electrical stimulus; the muscle was released from preload to zero-load with critical damping.<sup>13</sup> We determined  $V_{\max}$  using the zero-load clamp technique and maximum shortening velocity ( $_{\max}Vc$ ) of the twitch with preload only, maximum isometric active force normalized per cross-sectional area (AF), and peak of the positive force derivative normalized per cross-sectional area ( $+dF/dt$ ). We determined maximum lengthening velocity of the twitch with preload only ( $_{\max}Vr$ ) and peak of the negative force derivative at  $L_{\max}$  normalized per cross-sectional area ( $-dF/dt$ ). Because changes in the contraction phase induce coordinated changes in the relax-

ation phase, indexes of contraction-relaxation coupling thus have been developed to study lusitropy.<sup>16</sup> R1 coefficient =  $_{\max}Vc / _{\max}Vr$  studied the coupling between contraction and relaxation under low load, and thus lusitropy, in a manner that is independent of inotropic changes. R1 tests SR uptake function.<sup>2,13,16</sup> R2 coefficient =  $(+dF/dt)/(-dF/dt)$  studied the coupling between contraction and relaxation under high load, and thus lusitropy, in a manner that is less dependent on inotropic changes. R2 indirectly reflects myofilament calcium sensitivity.<sup>2,13,16</sup>

During rest in the rat myocardium, SR accumulates calcium and the first beat after the rest interval (B1) is more forceful than the last beat before the rest interval (B0).<sup>13</sup> During postrest recovery, the SR-dependent part of activator calcium decreases somewhat toward a steady state, which is achieved in a few beats. AF during postrest recovery was studied at a  $[Ca^{2+}]_o$  of 0.5 mM, after a 1-min rest duration, and the rate constant of the exponential decay of AF ( $\tau$ ) was determined.<sup>13</sup>  $\tau$  is assumed to represent the time required for the SR to reset  $Ca^{2+}$  homeostasis and thus was used to test SR function.<sup>13</sup> At the end of the study, the muscle cross-sectional area was calculated from its length and weight, assuming a density of 1.

#### *Quantification of $\alpha$ - and $\beta$ -Myosin Heavy Chain and SR $Ca^{2+}$ -ATPase mRNAs*

Total RNA was isolated from the individual left ventricle.<sup>17</sup> cDNA probes were labeled by random priming or nick translation with an  $\alpha$  [<sup>32</sup>P] dCTP and the synthetic oligonucleotides with T4 polynucleotide kinase and  $\gamma$  [<sup>32</sup>P] ATP. For Northern Blot analysis, 10  $\mu$ g of total RNA were submitted to electrophoresis and then transfer was performed on Nylon Hybond-N membrane (Amersham; Les Ulis, France). For Slot Blot analysis, 1, 2, 4, and 8  $\mu$ g of total RNA were directly applied to the membrane (Nylon Hybond-N membrane; Amersham). After ultraviolet irradiations to covalently link the RNA samples, the RNA blots were hybridized sequentially with an  $\alpha$ -myosin heavy chain (MHC) oligonucleotide probe,<sup>9</sup> a  $\beta$ -MHC cDNA probe,<sup>9</sup> a SR  $Ca^{2+}$ -ATPase cDNA probe,<sup>18</sup> a 18S rRNA oligonucleotide probe,<sup>9,18</sup> and a 25- to 30-mer oligo(dT) probe.<sup>9,18</sup> The last two probes were used to quantitate 18S rRNA and total poly(A)<sup>+</sup> mRNA, respectively, in a given left ventricle and to normalize the measurements.<sup>9,18</sup> Prehybridization, hybridization, and washing conditions were performed, as previously reported.<sup>9,18</sup> The washed blots were exposed to x-ray films (Hyperfilm; Amersham) with Quanta III intensifying screens for 16–48 h at  $-70^{\circ}C$ . The relative level of each mRNA species was determined in slot blots by scanning densitometry within the linear response range of the x-ray films. The densitometric scores of each specific mRNA were normalized to that of 18S rRNA or poly(A)<sup>+</sup> mRNA measured by oligo(dT).

**Table 1. Baseline Mechanical Variables of Papillary Muscles in Adult and Senescent Rats**

| Variables                                         | Adult<br>(n = 43) | Senescent<br>(n = 42) |
|---------------------------------------------------|-------------------|-----------------------|
| <b>Characteristics</b>                            |                   |                       |
| $L_{\max}$ (mm)                                   | $6.3 \pm 1.8$     | $6.1 \pm 1.8$         |
| CSA (mm <sup>2</sup> )                            | $0.60 \pm 0.20$   | $0.73 \pm 0.21^*$     |
| RF/TF                                             | $0.15 \pm 0.09$   | $0.33 \pm 0.18^*$     |
| <b>Contraction</b>                                |                   |                       |
| $V_{\max}$ (L <sub>max</sub> /s)                  | $3.46 \pm 0.62$   | $2.53 \pm 0.70^*$     |
| $\max V_c$ (L <sub>max</sub> /s)                  | $2.23 \pm 0.52$   | $1.21 \pm 0.37^*$     |
| $\Delta L$ (% L <sub>max</sub> )                  | $19 \pm 3$        | $13 \pm 2^*$          |
| AF (mN · mm <sup>-2</sup> )                       | $76 \pm 45$       | $49 \pm 29^*$         |
| +dF/dt (mN · s <sup>-1</sup> · mm <sup>-2</sup> ) | $1003 \pm 63$     | $549 \pm 342^*$       |
| <b>Relaxation</b>                                 |                   |                       |
| $\max V_r$ (L <sub>max</sub> /s)                  | $2.86 \pm 0.84$   | $1.67 \pm 0.68^*$     |
| -dF/dt (mN · s <sup>-1</sup> · mm <sup>-2</sup> ) | $439 \pm 256$     | $267 \pm 119^*$       |
| <b>Contraction-relaxation coupling</b>            |                   |                       |
| R1 (low load)                                     | $0.76 \pm 0.08$   | $0.74 \pm 0.10$       |
| R2 (high load)                                    | $2.27 \pm 0.58$   | $1.96 \pm 0.55^*$     |

Values are mean  $\pm$  SD.

\*  $P < 0.05$  vs. adult rats.

$L_{\max}$  = initial length; CSA = cross-sectional area; RF/TF = ratio of resting force to total force;  $V_{\max}$  = maximum unloaded shortening velocity;  $\max V_c$  = maximum shortening velocity; AF = isometric active force normalized per CSA; +dF/dt = peak of the positive force derivative normalized per CSA;  $\max V_r$  = maximum lengthening velocity; -dF/dt = peak of the negative force derivative normalized per CSA; R1 =  $\max V_c / \max V_r$ ; R2 = (+dF/dt<sub>max</sub>) / (-dF/dt<sub>max</sub>).

### Statistical Analysis

Data are expressed as mean  $\pm$  SD. Baseline values between groups were compared using the Student *t* test. Comparison of several means was performed using a repeated-measures analysis of variance and the Newman-Keuls test (concentrations of anesthetic agents expressed as vol%) or multivariate analysis of variance (concentrations of anesthetic agents expressed as multiples of MAC). All probability values were two-tailed, and *P* values less than 0.05 were required to reject the null hypothesis.

## Results

### Comparison between Adult and Senescent Rats

Body weight ( $490 \pm 118$  vs.  $328 \pm 38$  g,  $P < 0.05$ ), heart weight ( $1060 \pm 180$  vs.  $710 \pm 110$  mg,  $P < 0.05$ ), and left ventricular weight ( $760 \pm 150$  vs.  $520 \pm 90$  mg,  $P < 0.05$ ) were significantly higher in senescent than in adult rats. The heart weight to body weight ratio ( $2.23 \pm 0.55$  vs.  $2.10 \pm 0.38$  mg/g, NS) and the left ventricular weight to body weight ratio ( $1.58 \pm 0.33$  vs.  $1.58 \pm 0.20$  mg/g, NS) were not significantly different between senescent and adult rats.

The  $L_{\max}$  was not significantly different between papillary muscles from senescent and adult rats. On the other hand, CSA and RF/TF were higher in the senescent group (table 1). The intrinsic mechanical inotropic performance of papillary muscles from senescent rats was significantly lower in isometric (AF, +dF/dt) and iso-

tonic ( $V_{\max}$ ,  $\max V_c$ ,  $\Delta L$ ) conditions (table 1). Relaxation velocities were lower in senescent rats in isometric (-dF/dt) and isotonic ( $\max V_r$ ) conditions (table 1). R1 was not significantly different between senescent and adult groups. In contrast, R2 was lower in senescent group (table 1).

Compared with the adult group,  $\alpha$ -MHC mRNA concentration was lower in the senescent group whereas  $\beta$ -MHC mRNA concentration was higher (fig. 1). In addition, SR  $\text{Ca}^{2+}$ -ATPase mRNA relative concentration was lower in the senescent group (fig. 1), even when these mRNA species were normalized to rRNAs (data not shown).

### Inotropic Effects of Halogenated Anesthetics

At  $[\text{Ca}^{2+}]_0$  of 0.5 or 1.0 mM, halothane induced a marked concentration-dependent negative inotropic effect in adult and senescent rats, as shown by the decreases in AF (fig. 2). The negative inotropic effect was less pronounced in senescent rats only in isotonic conditions at  $[\text{Ca}^{2+}]_0$  of 0.5 mM ( $V_{\max}$  at 1.5%:  $63 \pm 22\%$  of baseline in senescent rats vs.  $48 \pm 15\%$  of baseline in adult rats,  $P < 0.01$ ) and in both isotonic and isometric conditions at  $[\text{Ca}^{2+}]_0$  of 1 mM (fig. 2). At a  $[\text{Ca}^{2+}]_0$  of 0.5 mM, isoflurane induced a moderate but significant negative inotropic effect, as shown by the decrease in AF (fig. 3) without significant differences between adult and senescent groups. At a  $[\text{Ca}^{2+}]_0$  of 1 mM, isoflurane induced a moderate negative inotropic effect only in isometric conditions (AF), without significant difference between adult and senescent rats (fig. 3).

Since MAC of halogenated anesthetic agents is 17% lower in senescent rats, we also plotted the inotropic effect as a function of MAC values in each group. At equipotent anesthetic concentrations, the negative inotropic effects of halothane remained significantly less pronounced in senescent rats compared with adult rats (fig. 4). In contrast, there was no significant difference between adult and senescent rats with isoflurane (fig. 4).

### Lusitropic Effects of Halogenated Anesthetics

At a  $[\text{Ca}^{2+}]_0$  of 1.0 mM and under isotonic conditions, halothane induced a complex effect in adult rats: a positive lusitropic effect at low concentrations and a negative lusitropic effect at high concentrations (fig. 5). These effects significantly differed in senescent rats since halothane induced only a moderate negative lusitropic effect at high concentrations (fig. 5). At a  $[\text{Ca}^{2+}]_0$  of 0.5 mM and in isotonic conditions, halothane induced a marked negative lusitropic effect (increase in R1) in adult rats, which was significant at 2.0 vol% (fig. 5). On the other hand, in isotonic conditions, halothane induced no significant lusitropic effect in senescent rats (fig. 5).

Under isometric conditions, whatever was the  $[\text{Ca}^{2+}]_0$  concentration, halothane induced a moderate but significant negative lusitropic effect (decrease in R2) similar in adult and senescent rats (data not shown). For example,



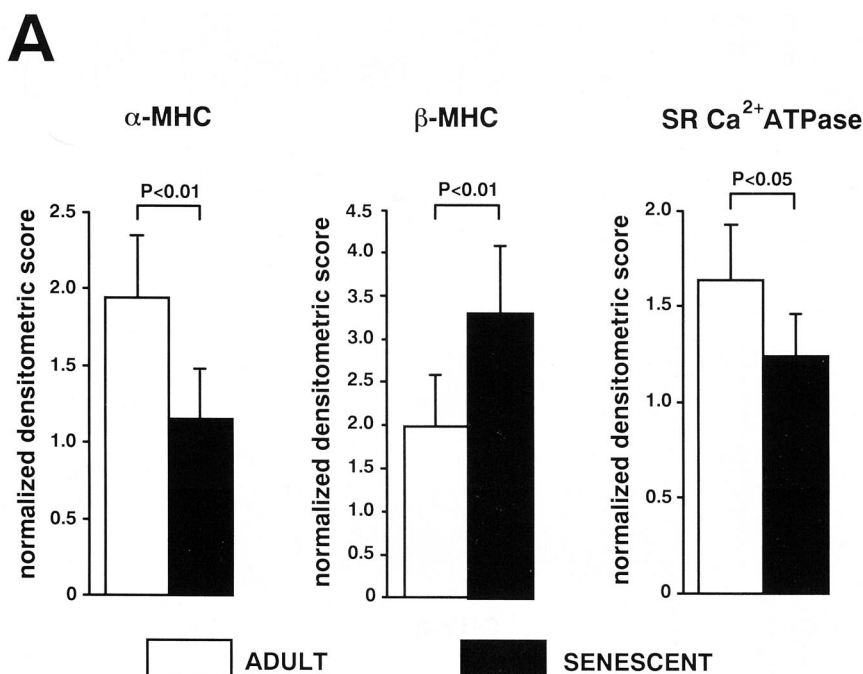

**Fig. 1.** Comparison of  $\alpha$ - and  $\beta$ -myosin heavy chain (MHC) and sarcoplasmic reticulum (SR)  $\text{Ca}^{2+}$ -ATPase mRNA concentrations in left ventricle from adult and senescent rats. (A)  $\alpha$ MHC,  $\beta$ MHC, and SR  $\text{Ca}^{2+}$ -ATPase mRNA concentrations are expressed in densitometric scores normalized to poly (A+) mRNA densitometric score, obtained by slot blot hybridization with the oligo d(T) probe. (B) Northern blot analysis of 20  $\mu\text{g}$  of total RNA, isolated from left ventricles of adult (A) and senescent (S) rats. Blots were sequentially hybridized with  $\alpha$ MHC,  $\beta$ MHC, SR  $\text{Ca}^{2+}$ -ATPase, and 18S probes. Data are mean  $\pm$  SD. P values = between-group differences.

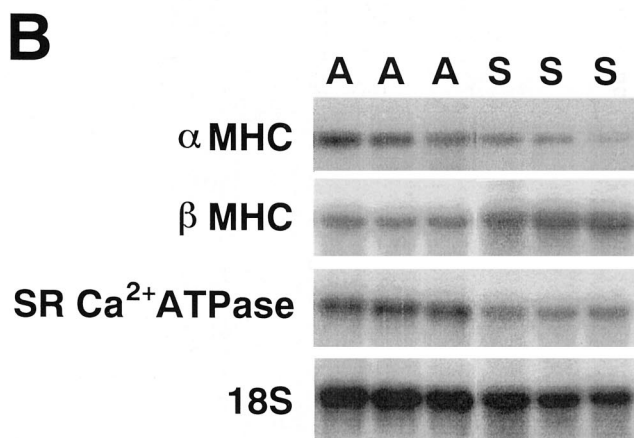

at a  $[\text{Ca}^{2+}]_0$  of 1 mM, the decrease in R2 induced by halothane (1.5%) was  $79 \pm 8\%$  of baseline in the senescent group and  $84 \pm 9\%$  of baseline in the adult group.

At a  $[\text{Ca}^{2+}]_0$  of 0.5 mM under low load, isoflurane induced a negative lusitropic effect at high concentrations similar in each group of rats (R1 at 2.0%:  $112 \pm 2\%$  of baseline in the senescent group *vs.*  $108 \pm 22\%$  in the adult group), whereas it induced no significant effect at a  $[\text{Ca}^{2+}]_0$  of 1 mM (data not shown). Under isometric conditions and whatever the  $[\text{Ca}^{2+}]_0$ , isoflurane induced no significant lusitropic effect in both groups (data not shown).

#### *Effects of Halogenated Anesthetics on Postrest Potentiation*

Isoflurane, but not halothane, slightly improved the postrest potentiation in both adult and senescent rats (table 2). There was no significant difference between the two

groups of rats. Whatever the group studied, halothane and isoflurane did not significantly modify  $\tau$  (table 2).

#### **Discussion**

In the present study, we showed that despite marked alterations in myocardial contraction and relaxation in senescent myocardium, associated with reexpression of  $\beta$ -MHC mRNAs and a decrease in SR  $\text{Ca}^{2+}$ -ATPase mRNA concentrations, halothane induced less pronounced negative inotropic and lusitropic effects in senescent than in adult rats, while isoflurane induced similar effects in both groups.

The mortality rate is 50% in 24-month old rats, approximately corresponding to humans aged 75 yr, both in terms of mortality and molecular and cellular alterations.<sup>19</sup> We observed important alterations in the myo-

Fig. 2. Comparison of the effects of halothane in adult and senescent rats on isometric active force normalized per cross-sectional area (AF), at a calcium concentration of 0.5 (A; adult  $n = 12$ , senescent  $n = 12$ ) or 1 mM (B; adult  $n = 8$ , senescent  $n = 6$ ). Concentrations are reported in vol%. Data are mean  $\pm$  SD.  $P$  values refer to between-group differences. NS = not significant. \* =  $P < 0.05$  versus baseline values.

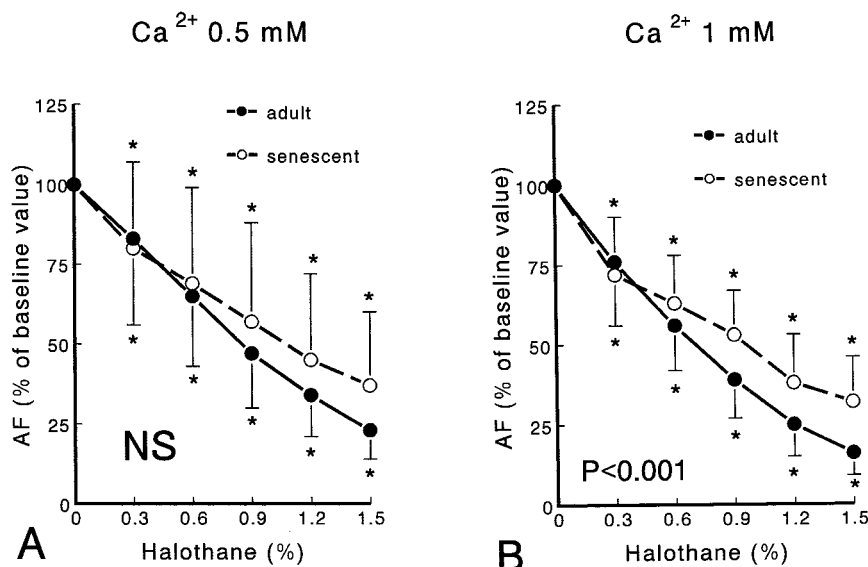

cardium of these senescent rats. The rat ventricle contains two isoforms of myosin heavy chains,  $\alpha$  and  $\beta$  isoforms within a high and slow ATPase activity, respectively.<sup>20</sup> During aging, our results showed an inactivation of the gene coding for  $\alpha$ MHC associated with a reexpression of the  $\beta$ MHC gene. This isomyosin shift results in a decreased ATPase activity which correlates with the decline in  $V_{max}$ , as previously reported.<sup>9</sup> Several hypothesis can explain the decrease in force in senescent rats: (1) an important fibrosis, responsible for a decrease in the myofibrillar content<sup>9</sup>; (2) actomyosin cross-bridge kinetic alterations, but this hypothesis remains to be tested. In contrast, several studies found no significant change in myofilament calcium sensitivity in the senescent rat.<sup>21,22</sup> As shown by the increase in R1, the relaxation velocity is decreased in senescent papillary muscles.<sup>9</sup> Calcium extrusion by  $Na^+-Ca^{2+}$  exchanger and uptake by the SR  $Ca^{2+}$ -ATPase are the two major deter-

minants of relaxation. However, in the rat, the SR plays a more important role in the relaxation process than in other mammalian species. We and others<sup>9,23</sup> have observed a significant decrease in SR  $Ca^{2+}$ -ATPase mRNA concentrations and Heyliger *et al.*<sup>24</sup> have reported a reduction in the activity of the  $Na^+-Ca^{2+}$  exchanger during aging.

The cardiac effects of halothane and isoflurane have been widely studied *in vitro*.<sup>1-6</sup> Vivien *et al.*<sup>6</sup> showed that their negative inotropic effects were more pronounced in cardiomyopathic hamsters. Our study is the first to assess the effects of volatile anesthetics in senescent myocardium. Volatile anesthetics induce myocardial depression *via* marked alterations in calcium homeostasis: (1) a decrease in the inward calcium current ( $I_{Ca}$ ), related to an inhibition of both L-type calcium channels and  $Na^+-Ca^{2+}$  exchanger<sup>25</sup>; (2) a decrease in SR function, which occurs to a lesser extent with isoflu-

Fig. 3. Comparison of the effects of isoflurane in adult and senescent rats on isometric active force normalized per cross-sectional area (AF), at a calcium concentration of 0.5 (A; adult  $n = 10$ , senescent  $n = 12$ ) or 1 mM (B; adult  $n = 6$ , senescent  $n = 6$ ). Concentrations are reported in vol%. Data are mean  $\pm$  SD.  $P$  values refer to between-group differences. NS = not significant. \* =  $P < 0.05$  versus baseline values.

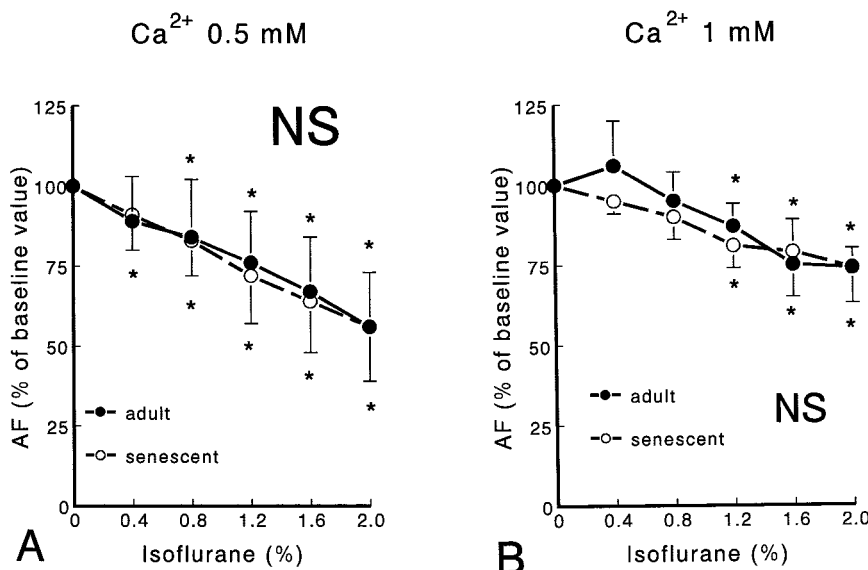

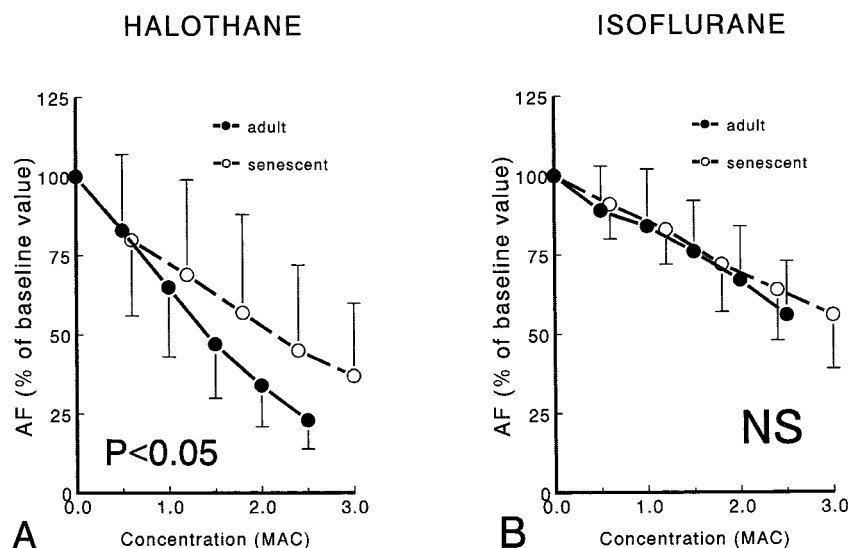

Fig. 4. Comparison of the effects of halothane (A) and isoflurane (B) on isometric active force (AF) normalized per cross-sectional area of papillary muscles from adult (halothane  $n = 12$ ; isoflurane  $n = 10$ ) and senescent (halothane  $n = 12$ ; isoflurane  $n = 12$ ) rats at a calcium concentration of 1 mM. Halothane and isoflurane concentrations are reported as minimum alveolar concentration (MAC) multiples in each group. Data are mean  $\pm$  SD.  $P$  values refer to between-group differences. NS = not significant. \* =  $P < 0.05$  versus baseline values.

rane than with halothane<sup>26</sup>; furthermore, halothane, but not isoflurane, increases calcium permeability of SR membrane, which contributes to depleting the SR calcium stores<sup>26</sup>; this effect may be related to the fact that halothane, but not isoflurane, induces an increase in the opening duration of the cardiac SR calcium release channel (*i.e.*, ryanodine receptor) without altering the conductance or the opening likelihood<sup>27</sup>; and (3) a decrease in  $\text{Ca}^{2+}$  myofilament sensitivity, although the magnitude of this effect is still debated.<sup>3</sup> In our study, halothane induced a lower negative inotropic effect in senescent than in adult rats, in spite of the marked contractile proteins alterations observed during senescence. During aging, ryanodine receptor density and activity are decreased<sup>28,29</sup> without changes in mRNA concentrations (posttranscriptional regulation).<sup>18</sup> On the other hand, in hypertrophied senescent myocytes, Walker *et al.*<sup>30</sup> observed a proportional increase in the number of  $\text{Ca}^{2+}$  channels while the action potential duration is pro-

longed in relation with a slowed inactivation of L-type  $\text{Ca}^{2+}$  channel current, and consequently, the  $\text{Ca}^{2+}$  current density is maintained. These differences may, at least partly, explain the lower negative inotropic effect of halothane in senescent rat.

In our study, isoflurane induced lower negative inotropic effects than halothane, in both groups, as previously reported.<sup>2</sup> However, the inotropic effects of isoflurane were not significantly different between adult and senescent rats. The inotropic effects of isoflurane are mainly related to its effects on  $\text{Ca}^{2+}$  channel and myofilament  $\text{Ca}^{2+}$  sensitivity, without any significant effect on SR. The difference observed between halothane and isoflurane may be related to the absence of effect of isoflurane on the SR, or to the weak negative inotropic effect of isoflurane, which might have precluded us to show a difference during aging.

The MAC of halothane is decreased in senescent rats.<sup>15</sup> The expression of AF as a function of MAC in each group

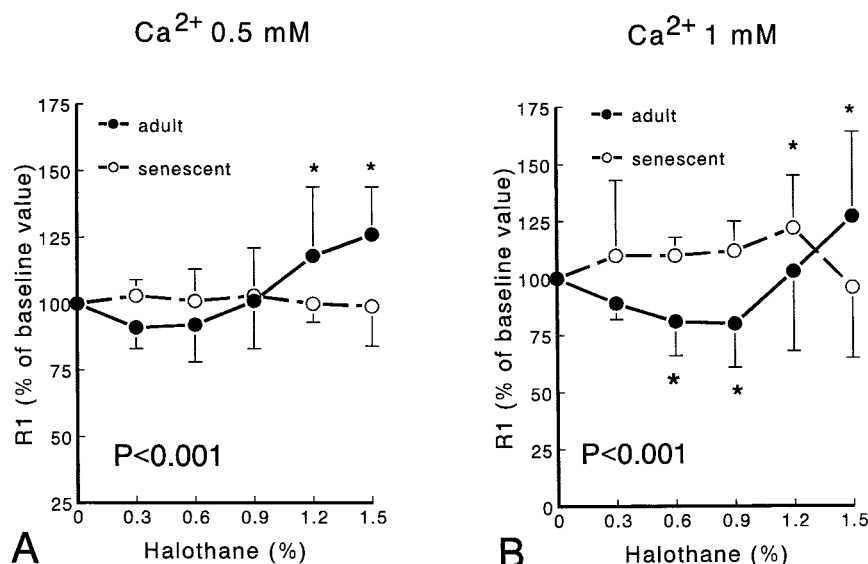

Fig. 5. Comparison of the lusitropic effects of halothane under low load under isotonic conditions ( $R1 = \text{max Vc} / \text{max Vr}$ ) in adult and senescent at a calcium concentration of 0.5 mM (A; adult  $n = 12$ , senescent  $n = 12$ ) or 1.0 mM (B; adult  $n = 8$ , senescent  $n = 6$ ). Halothane concentrations are reported in vol%. Data are mean  $\pm$  SD.  $P$  values refer to between-group differences. NS = not significant. \* =  $P < 0.05$  versus baseline values.

**Table 2. Effects of Halothane (0.6%) and Isoflurane (0.8%) on Postrest Potentiation**

|            | B1/B0 (%)     |               | $\tau$ (Beats) |               |
|------------|---------------|---------------|----------------|---------------|
|            | Adult         | Senescent     | Adult          | Senescent     |
|            | (n = 10)      | (n = 12)      | (n = 10)       | (n = 12)      |
| Baseline   | 173 $\pm$ 38  | 151 $\pm$ 38  | 4.5 $\pm$ 0.8  | 4.3 $\pm$ 0.8 |
| Halothane  | 162 $\pm$ 26  | 161 $\pm$ 33  | 3.7 $\pm$ 0.9  | 3.5 $\pm$ 0.6 |
|            | (n = 12)      | (n = 10)      | (n = 10)       | (n = 10)      |
| Baseline   | 159 $\pm$ 16  | 145 $\pm$ 34  | 3.9 $\pm$ 1.1  | 4.4 $\pm$ 1.0 |
| Isoflurane | 176 $\pm$ 16* | 177 $\pm$ 46* | 4.1 $\pm$ 1.2  | 4.2 $\pm$ 0.6 |

Values are mean  $\pm$  SD.

\* =  $P < 0.05$  vs. baseline values. No significant differences between groups.

B1 = first isometric contraction after rest; B0 = last isometric contraction before rest;  $\tau$  = rate constant of the exponential decay in active isometric force (AF) after postrest potentiation;  $\tau$  = number of beats required for postrest contraction to decay to one-tenth of its maximum (B1).

confirmed that the negative inotropic effect of halothane is lower in senescent rats and also confirmed the lack of significant difference observed with isoflurane. As previously discussed in diseased myocardium,<sup>6</sup> because little information is available about anesthetic potency during senescence in humans, we believe that it was important to report our results from a pharmacological (fig. 2) and a clinically relevant (fig. 4) point of view.

We observed that the lusitropic effect of halothane on R1 differs between adult and senescent papillary muscles. At a  $[Ca^{2+}]_0$  of 0.5 mM, halothane induced a negative lusitropic effect observed only in adult rats. This result is consistent with previous studies in adult rats,<sup>2</sup> suggesting a decrease in SR calcium uptake. Halothane induces an alteration of cytosolic calcium concentration return during the relaxation phase,<sup>31</sup> resulting from an inhibition of the SR  $Ca^{2+}$ -ATPase.<sup>32</sup> During senescence the activity of  $Ca^{2+}$ -ATPase is reduced.<sup>10</sup> Nevertheless, even if capture and extrusion lastings are increased,<sup>10</sup> the amount of calcium pumped by the SR is unchanged in senescent rats. Moreover, the halothane-induced inhibition of SR  $Ca^{2+}$ -ATPase is enhanced when phospholamban is phosphorylated,<sup>32</sup> and Xu *et al.*<sup>33</sup> have reported a significant age-related decrease in the phosphorylation of phospholamban by the endogenous SR-associated calmoduline kinase, which may be attributed to the decrease in the amount of  $\delta$ -calmoduline kinase II, the predominant isoform present in cardiac cytosol and SR. These important senescence-induced differences may explain the lower negative lusitropic effects of halothane observed in senescent rats. In addition, we also demonstrated that the lusitropic effect of halothane on R1 depends on the  $Ca^{2+}$  concentration. Using cardiac SR vesicles, Karon *et al.*<sup>32</sup> have also reported that the halothane-induced inhibition of  $Ca^{2+}$  uptake was more pronounced at low than at high  $Ca^{2+}$  concentrations. These results can explain, at least partly, the different effects of halothane on R1 at 0.5 and 1.0 mM of calcium. However, at a high  $Ca^{2+}$  concentration, no significant difference in the lusitropic effects of halothane was noted between adult and senescent rat. Isoflurane did not induce any significant lusitropic effect on R1 in senescent and adult rats, as previously

reported.<sup>2</sup> These results concord with the absence of reported effect of isoflurane on SR.

We showed that isoflurane, but not halothane, slightly improved postrest potentiation in both adult and senescent rats. Postrest potentiation provides a useful tool for examining complex underlying cellular processes, such as SR calcium release in cardiac muscle.<sup>2,13</sup> In both groups, halothane and isoflurane did not affect postrest recovery, assessed by the rate constant,  $\tau$ , of the exponential decay of force. As previously reported, in the adult rat,<sup>2</sup> these results suggest that halogenated anesthetics do not significantly alter the recirculation fraction of calcium within the SR whatever the age of the animals.

Coefficient R2 tests the lusitropic state under isometric conditions and thus reflects myofilament  $Ca^{2+}$  sensitivity.<sup>2,16</sup> Several studies have reported that myofilament calcium sensitivity is not significantly modified during senescence.<sup>21,22</sup> This is in accordance with data from our laboratory, showing that the active force- $Ca^{2+}$  relationship is similar between adult and senescent rats (S. Rozenberg, personal communication, 2002). Our results showed that halothane, but not isoflurane, induced a small decrease in R2 whatever the  $Ca^{2+}$  concentration in both adult and senescent rats, but this effect has been previously related to the decrease in force and not to a decrease in myofilament  $Ca^{2+}$  sensitivity.<sup>6,34</sup> These results suggest that the difference in the myocardial effects of halogenated anesthetics do not rely on different action on myofilament  $Ca^{2+}$  sensitivity.

The following points must be considered in the assessment of the clinical relevance of our results. First, because this study was conducted *in vitro*, it addressed only intrinsic myocardial contractility. Observed changes in cardiac function after anesthetic administration also depend on modifications in heart rate, venous return, afterload, sympathetic nervous system activity, and compensatory mechanisms. Second, this study was carried out at 29°C and at low-stimulation frequency; however, papillary muscles must be studied at this temperature because the stability of mechanical parameters is not sufficient at 37°C and at low frequency because high-stimulation frequency may induce



core hypoxia.<sup>2,13</sup> Third, we studied 24-month-old Wistar rats whose ventricular function is not altered,<sup>18</sup> and this is not the case in very old rats (>28 month old).<sup>35</sup> Further studies may be useful in older animals. Fourth, it was performed on rat myocardium, which differs from human myocardium, but the effects of volatile anesthetics on the myocardium appear to be very similar among species, at least for halothane and isoflurane.<sup>36</sup>

In conclusion, in spite of marked alterations in the senescent myocardium, the inotropic and lusitropic effects of halothane were less important in senescent than in adult rats, whereas the effects of isoflurane were similar. These differences (adult *vs.* senescent rats and halothane *vs.* isoflurane) are probably related to differences in SR function and in the halogenated anesthetics-induced effects on the SR.

The authors thank Anne Marie Lompré, Ph.D., (INSERM IFR 75, Signalisation et Innovation Thérapeutique, Faculté des Sciences Pharmaceutiques et Biologiques, Université Paris Sud, Chateaufort-Malabry, France) for the gift of SR Ca<sup>2+</sup>-ATPase cDNA and  $\beta$ MHC cDNA, Claude Sebban, Ph.D., and Brigitte Tesolin-Decros, Ph.D., (Laboratoire de Biologie du Vieillessement, Hôpital Charles Foix, Ivry sur Seine, France) for providing senescent rats, and David Baker, M.D., F.R.C.A. (Department of Anesthesiology, CHU Necker-Enfants-Malades, Paris, France) for reviewing the manuscript.

## References

- Hanouz JL, Massetti M, Guesne G, Chanel S, Babatasi G, Rouet R, Ducouret P, Kayat A, Galateau F, Bricard H, Gérard JL: *In vitro* effects of desflurane, sevoflurane, isoflurane, and halothane in isolated human right atria. *ANESTHESIOLOGY* 2000; 92:116-24
- Hanouz JL, Vivien B, Gueugniaud PY, Lecarpentier Y, Coriat P, Riou B: Comparison of the effects of sevoflurane, isoflurane and halothane on rat myocardium. *Br J Anaesth* 1998; 80:621-7
- Tavernier BM, Adnet PJ, Imbenotte M, Etchervi TS, Reyford H, Haudecoeur G, Scherpereel P, Krivosic-Horber RM: Halothane and isoflurane decrease calcium sensitivity and maximal force in human skinned cardiac fibers. *ANESTHESIOLOGY* 1994; 80:372-82
- Kissin I, Thomson CT, Smith LR: Effects of halothane on contractile function of ischemic myocardium. *J Cardiovasc Pharmacol* 1983; 5:438-42
- Pagel PS, Lowe D, Hettrick DA, Jamali IN, Kersten JR, Tessmer JP, Warltier DC: Isoflurane, but not halothane, improves indices of diastolic performance in dogs with rapid ventricular, pacing-induced cardiomyopathy. *ANESTHESIOLOGY* 1996; 85:644-54
- Vivien B, Hanouz JL, Gueugniaud PY, Lecarpentier Y, Coriat P, Riou B: Myocardial effects of halothane and isoflurane in hamsters with hypertrophic cardiomyopathy. *ANESTHESIOLOGY* 1997; 87:1406-16
- Besse S, Robert V, Assayag P, Delcayre C, Swynghedauw B: Nonsynchronous changes in myocardial collagen mRNA and protein during aging. Effect of DOCA-salt hypertension. *Am J Physiol* 1994; 267:H2237-44
- Orchard CH, Lakatta EG: Intracellular calcium transients and developed tension in rat heart muscle. A mechanism for the negative interval-strength relationship. *J Gen Physiol* 1985; 86:637-51
- Besse S, Assayag P, Delcayre C, Carré F, Cheav SL, Lecarpentier Y, Swynghedauw B: Normal and hypertrophied senescent rat heart: Mechanical and molecular characteristics. *Am J Physiol* 1993; 265:H183-90
- Besse S, Moalic JM, Delcayre C, Chevalier B, Assayag P, Swynghedauw B: The senescent heart: Clinical and biological characteristics. *Facts Res Gerontol* 1993; 7:95-102
- Clergue F, Auroy Y, Pequignot F, Jouglé E, Lienhart A, Laxenaire MC: French survey of anesthesia in 1996. *ANESTHESIOLOGY* 1999; 91:1509-20
- Rooke GA, Reves JG, Rosow C: Anesthesiology and geriatric medicine: Mutual needs and opportunities. *ANESTHESIOLOGY* 2002; 96:2-4
- Riou B, Lecarpentier Y, Viars P: Inotropic effects of ketamine on rat cardiac papillary muscle. *ANESTHESIOLOGY* 1989; 71:116-25
- Eger EI, Johnson BH: Rates of awakening from anesthesia with I-653, halothane, isoflurane, and sevoflurane: A test of the effect of anesthetic concentration and duration in rats. *Anesth Analg* 1987; 66:977-82
- Loss GE, Seifen E, Kennedy RH, Seifen AB: Aging: Effects on minimum alveolar concentration (MAC) for halothane in Fischer-344 rats. *Anesth Analg* 1989; 68:359-62
- Chemla D, Lecarpentier Y, Martin JL, Clergue M, Antonetti A, Hatt PY: Relationship between inotropy and relaxation in rat myocardium. *Am J Physiol* 1986; 250:H1008-16
- Chomczynski P, Sacchi N: Single-step method of RNA isolation by acid guanidinium thiocyanate-phenol-chloroform extraction. *Anal Biochem* 1987; 162:156-9
- Assayag P, Charlemagne D, de Leiris J, Boucher F, Valere PE, Lortet S, Swynghedauw B, Besse S: Senescent heart compared with pressure overload-induced hypertrophy. *Hypertension* 1997; 29:15-21
- Swynghedauw B, Besse S, Assayag P, Carré F, Chevalier B, Charlemagne D, Delcayre C, Hardouin S, Heymes C, Moalic JM: Molecular and cellular biology of the senescent hypertrophied and failing heart. *Am J Cardiol* 1995; 76:2D-7D
- Swynghedauw B: Developmental and functional adaptation of contractile proteins in cardiac and skeletal muscles. *Physiol Rev* 1986; 66:710-71
- Bathnagar GM, Walford GD, Beard ES, Humphreys S, Lakatta EG: ATPase activity and force production in myofibrils and twitch characteristics in intact muscle from neonatal, adult, and senescent rat myocardium. *J Mol Cell Cardiol* 1984; 16:203-18
- Fitzsimons DP, Patel JR, Moss RL: Aging-dependent depression in the kinetics of force development in rat skinned myocardium. *Am J Physiol* 1999; 276:H1511-9
- Lompré AM, Lambert F, Lakatta EG, Schwartz K: Expression of sarcoplasmic reticulum Ca<sup>2+</sup> ATPase and calsequestrin genes in heart during ontogenic development and aging. *Circ Res* 1991; 69:1380-8
- Heyliger CE, Prakash AR, McNeill JH: Alterations in membrane Na<sup>+</sup>-Ca<sup>2+</sup> exchange in the aging myocardium. *Age* 1988; 11:1-6
- Haworth RA, Goknur AB: Inhibition of sodium/calcium exchange and calcium channels of heart cells by volatile anesthetics. *ANESTHESIOLOGY* 1995; 82:1255-65
- Davies LA, Gibson CN, Boyett MR, Hopkins PM, Harrison SM: Effects of isoflurane, sevoflurane, and halothane on myofilament Ca<sup>2+</sup> sensitivity and sarcoplasmic reticulum Ca<sup>2+</sup> release in rat ventricular myocytes. *ANESTHESIOLOGY* 2000; 93:1034-44
- Connelly TJ, Coronado R: Activation of the Ca<sup>2+</sup> release channel of cardiac sarcoplasmic reticulum by volatile anesthetics. *ANESTHESIOLOGY* 1994; 81:459-69
- Matsuda H, McCully JD, Levitsky S: Developmental differences in cytosolic calcium accumulation associated with global ischemia: Evidence for differential intracellular calcium channel receptor activity. *Circulation* 1997; 96(Suppl II):II-233-8
- Assayag P, Charlemagne D, Marty I, de Leiris J, Lompré AM, Boucher F, Valere PE, Lortet S, Swynghedauw B, Besse S: Effects of sustained low-flow ischemia on myocardial function and calcium-regulating proteins in adult and senescent rat hearts. *Cardiovasc Res* 1998; 38:169-80
- Walker KE, Lakatta EG, Houser SR: Age associated changes in membrane currents in rat ventricular myocytes. *Cardiovasc Res* 1993; 27:1968-77
- Sivarajan M, Su JY, Hofer BO: Effects of halothane on calcium<sup>2+</sup>-activated tension of the contractile proteins and calcium<sup>2+</sup> uptake and release by the sarcoplasmic reticulum in skinned human myocardial fibers. *Anesth Analg* 1995; 81:52-6
- Karon BS, Geddis LM, Kutchai H, Thomas D: Anesthetics alter the physical and functional properties of the Ca<sup>2+</sup> ATPase in cardiac sarcoplasmic reticulum. *Biophys J* 1995; 68:936-45
- Xu A, Narayanan N: Effects of aging on sarcoplasmic reticulum Ca<sup>2+</sup>-cycling proteins and their phosphorylation in rat myocardium. *Am J Physiol* 1998; 275:H2087-94
- Hanouz JL, Riou B, Massias L, Lecarpentier Y, Coriat P: Interaction of halothane with  $\alpha$ - and  $\beta$ -adrenoceptor stimulations in rat myocardium. *ANESTHESIOLOGY* 1997; 86:147-59
- Anversa P, Capasso JM: Cellular basis of aging in the mammalian heart. *Scanning Microsc* 1991; 5:1065-73
- Vivien B, David JS, Hanouz JL, Amour J, Lecarpentier Y, Coriat P, Riou B: The paradoxical positive inotropic effect of sevoflurane in healthy and cardiomyopathic hamsters. *Anesth Analg* 2002; 95:31-8
